# Supplementary material for: Heavy Water Reduces GFP Expression in Prokaryotic Cell-Free Assays at the Translation Level While Stimulating Its Transcription
Source: Hindawi journal article supplement (doi:10.1155/2013/592745), 2013-01-01
Supplement: f1 [file 592745.f1.pdf]

Supporting Information for:

## Heavy water reduces GFP expression in prokaryotic cell-free assays at the translation level while stimulating its transcription

Luisa S. Hohlefeld<sup>1</sup><sup>‡</sup>, Tobias Stögbauer<sup>1</sup><sup>‡</sup>, Madeleine Opitz<sup>1</sup>,  
Thomas M. Bayerl, Joachim O. Rädler<sup>1</sup>

<sup>1</sup> Center for Nanoscience, CeNS, Ludwig-Maximilians-Universität,  
Fakultät für Physik, Geschwister Scholl Platz 1, 80539 München, Germany

<sup>‡</sup> contributed equally to this paper and should be considered as co-first authors

### Supporting Figures:

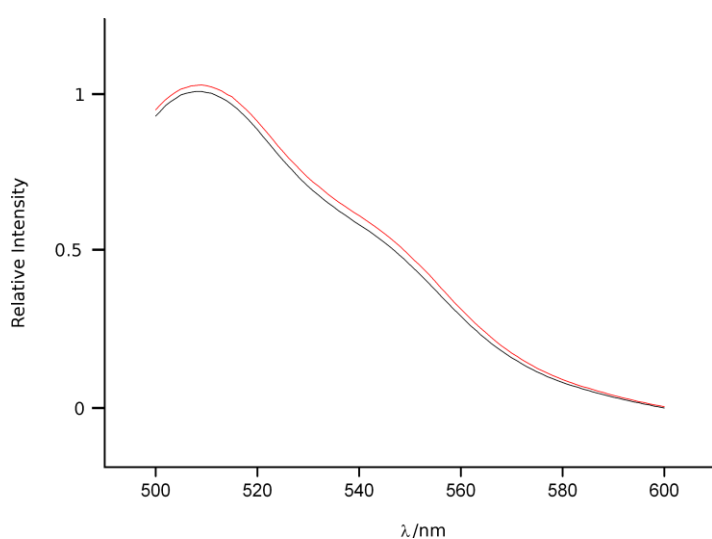

**Supporting Figure 1: Emission spectra of GFP diluted in H<sub>2</sub>O or D<sub>2</sub>O.** Black line: GFP fluorescence emission spectra for GFP diluted in H<sub>2</sub>O. Red line: GFP fluorescence emission spectra for GFP diluted in D<sub>2</sub>O. Mature/purified GFP was diluted one to ten in H<sub>2</sub>O or D<sub>2</sub>O respectively and the fluorescence emission spectra were recorded. As can be seen, the GFP fluorescence spectra are quantitatively and qualitatively identical for GFP diluted in H<sub>2</sub>O and D<sub>2</sub>O. This result is in accordance with previous findings for e.g. the GFP variant S65T. Here, again the observed absorbance spectra of the GFP in H<sub>2</sub>O or D<sub>2</sub>O are identical [24, 25]. We are therefore confident, that the increase of the relative GFP level in **Fig. 1** is mainly due to a direct effect of D<sub>2</sub>O on GFP expression.

### Supporting Tables:

**Table 1: pH values of the D<sub>2</sub>O-H<sub>2</sub>O mixtures used in this study**

| D <sub>2</sub> O concentration | pH value    |
|--------------------------------|-------------|
| 0%                             | 6.98 ± 0.06 |
| 10%                            | 6.99 ± 0.07 |
| 20%                            | 7.08 ± 0.17 |
| 30%                            | 7.08 ± 0.12 |
| 40%                            | 7.25 ± 0.20 |
| 50%                            | 7.28 ± 0.19 |
| 60%                            | 7.53 ± 0.08 |
